# Supplementary material
Source: PubMed Central journal article supplement (PMC3610596)
Supplement: chest_142_3_568_ds01.pdf [file chest_142_3_568_ds01.pdf]

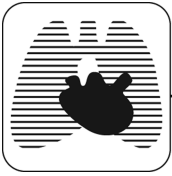

### Randomized Clinical Trial of Endobronchial Ultrasound Needle Biopsy With and Without Aspiration

*Roberto F. Casal, MD; Gregg A. Staerke, MD; David Ost, MD, FCCP; Francisco A. Almeida, MD, FCCP; Mateen H. Uzbeck, MD; George A. Eapen, MD, FCCP; Carlos A. Jimenez, MD, FCCP; Graciela M. Nogueras-Gonzalez, MPH; Mona Sarkiss, MD, PhD; and Rodolfo C. Morice, MD, FCCP*

#### e-Appendix 1.

|                                              |                                             |   |
|----------------------------------------------|---------------------------------------------|---|
| <b>Background blood or clot</b>              | Large amount, great compromise to diagnosis | 0 |
|                                              | Moderate amount, diagnosis possible         | 1 |
|                                              | Minimal, diagnosis easy; "textbook" quality | 2 |
| <b>Amount of cellular material</b>           | Minimal to absent, diagnosis not possible   | 0 |
|                                              | Sufficient for cytodiagnosis                | 1 |
|                                              | Abundant, diagnosis simple                  | 2 |
| <b>Degree of cellular degeneration</b>       | Marked, diagnosis impossible                | 0 |
|                                              | Moderate, diagnosis possible                | 1 |
|                                              | Minimal, good preservation, diagnosis easy  | 2 |
| <b>Degree of cellular trauma</b>             | Marked, diagnosis not possible              | 0 |
|                                              | Moderate, diagnosis possible                | 1 |
|                                              | Minimal, diagnosis obvious                  | 2 |
| <b>Retention of appropriate architecture</b> | Minimal to absent, nondiagnostic            | 0 |
|                                              | Moderate, some preservation,                | 1 |
|                                              | Excellent, diagnosis obvious                | 2 |
| <b>Total Mair's Score</b>                    | Poor ( 0 - 2 ) Good (3-6) Superior (7-10)   |   |

Mair, S., et al., *Fine needle cytology--is aspiration suction necessary? A study of 100 masses in various sites.* Acta Cytol, 1989. 33(6): p. 809-13.

*Online supplements are not copyedited prior to posting.*



Concordance between EBUS-TBNA and EBUS-TBNCS in sample adequacy, diagnosis and quality for lymph nodes equal or smaller than 1 cm in short axis (n=73).

| Transbronchial Needle Capillary Sampling |                              |                          |         |         |                                         |                                         |
|------------------------------------------|------------------------------|--------------------------|---------|---------|-----------------------------------------|-----------------------------------------|
| Transbronchial Needle Aspiration         | <b>Adequate Sample (%)</b>   | Yes                      | Yes     | No      | Concordance (95 CI)<br>82.2 (71.5-90.2) |                                         |
|                                          |                              | Yes                      | 58 (79) | 6 (8)   |                                         |                                         |
|                                          |                              | No                       | 7 (10)  | 2 (3)   |                                         |                                         |
|                                          | <b>Diagnostic Sample (%)</b> | Yes                      | Yes     | No      | Concordance (95 CI)<br>98.6 (92.6-100)  |                                         |
|                                          |                              | Yes                      | 13 (18) | 1 (1)   |                                         |                                         |
|                                          |                              | No                       | 0 (0)   | 59 (81) |                                         |                                         |
|                                          | <b>Malignancy (%)</b>        | Yes                      | Yes     | No      | Concordance (95 CI)<br>98.6 (92.6-100)  |                                         |
|                                          |                              | Yes                      | 10 (14) | 1 (1)   |                                         |                                         |
|                                          |                              | No                       | 0 (0)   | 62 (85) |                                         |                                         |
|                                          | <b>Sample Quality (%)</b>    | Poor<br>Good<br>Superior | Poor    | Good    | Superior                                | Concordance (95 CI)<br>82.2 (71.5-90.2) |
|                                          |                              |                          | 0 (0)   | 0 (0)   | 0 (0)                                   |                                         |
|                                          |                              |                          | 0 (0)   | 3 (4)   | 7 (10)                                  |                                         |
|                                          |                              |                          | 0 (0)   | 6 (8)   | 57 (78)                                 |                                         |
|                                          |                              |                          |         |         |                                         |                                         |

Concordance between EBUS-TBNA and EBUS-TBNCS in sample adequacy, diagnosis and quality for lymph nodes larger than 1 cm in short axis (n=119).

| Transbronchial Needle Capillary Sampling |                              |                          |         |         |                                         |                                       |
|------------------------------------------|------------------------------|--------------------------|---------|---------|-----------------------------------------|---------------------------------------|
| Transbronchial Needle Aspiration         | <b>Adequate Sample (%)</b>   | Yes                      | Yes     | No      | Concordance (95 CI)<br>84.9 (77.2-90.8) |                                       |
|                                          |                              | Yes                      | 95 (80) | 10 (8)  |                                         |                                       |
|                                          |                              | No                       | 8 (7)   | 6 (5)   |                                         |                                       |
|                                          | <b>Diagnostic Sample (%)</b> | Yes                      | Yes     | No      | Concordance (95 CI)<br>94.1 (88.3-97.6) |                                       |
|                                          |                              | Yes                      | 50 (42) | 5 (4)   |                                         |                                       |
|                                          |                              | No                       | 2 (2)   | 62 (52) |                                         |                                       |
|                                          | <b>Malignancy (%)</b>        | Yes                      | Yes     | No      | Concordance (95 CI)<br>97.5 (92.8-99.5) |                                       |
|                                          |                              | Yes                      | 39 (33) | 0 (0)   |                                         |                                       |
|                                          |                              | No                       | 0 (0)   | 80 (67) |                                         |                                       |
|                                          | <b>Sample Quality (%)</b>    | Poor<br>Good<br>Superior | Poor    | Good    | Superior                                | Concordance (95 CI)<br>84 (76.2-90.1) |
|                                          |                              |                          | 0 (0)   | 0 (0)   | 0 (0)                                   |                                       |
|                                          |                              |                          | 0 (0)   | 5 (4)   | 10 (8)                                  |                                       |
|                                          |                              |                          | 0 (0)   | 9 (8)   | 95 (80)                                 |                                       |
|                                          |                              |                          |         |         |                                         |                                       |

*Online supplements are not copyedited prior to posting.*
